# Supplementary material for: A pan-influenza monoclonal antibody neutralizes H5 strains and prophylactically protects through intranasal administration
Source: PubMed Central journal article supplement (PMC10869794; doi:10.1038/s41598-024-53049-5), 2024-02-15
Supplement: 41598_2024_53049_MOESM1_ESM.pdf [file 41598_2024_53049_MOESM1_ESM.pdf]

## **SUPPLEMENTARY MATERIAL TO:**

### **A pan-influenza monoclonal antibody neutralizes H5 strains and protects through intranasal administration**

Anna L. Beukenhorst<sup>1,2,3\*</sup>, Jacopo Frallicciardi<sup>2</sup>, Keira L. Rice<sup>2</sup>, Martin H. Koldijk<sup>2</sup>, Joana C. Moreira de Mello<sup>2</sup>, Jaco M. Klap<sup>2</sup>, Christoforos Hadjichrysanthou<sup>4</sup>, Clarissa M. Koch<sup>2</sup>, Kelly A.S. da Costa<sup>5</sup>, Nigel Temperton<sup>5</sup>, Babette A. de Jong<sup>2</sup>, Helene Vietsch<sup>2</sup>, Bertjan Ziere<sup>2</sup>, Boris Julg<sup>2</sup>, Wouter Koudstaal<sup>2</sup> & Jaap Goudsmit<sup>2,6</sup>

1. Department of Biostatistics, Harvard T.H. Chan School of Public Health, Boston, MA, USA
2. Leyden Laboratories BV, Leiden, The Netherlands.
3. Centre for Epidemiology, University of Manchester, Manchester Academic Health Science Centre, Manchester, UK
4. Department of Mathematics, University of Sussex, Brighton, UK
5. Viral Pseudotype Unit, Medway School of Pharmacy, University of Kent & University of Greenwich, Chatham, United Kingdom
6. Departments of Epidemiology, Immunology and Infectious Diseases, Harvard TH Chan School of Public Health, Boston, MA, USA.

**Supplementary Table 1.** Strains tested in the pseudotype virus neutralization assay (PNA).

| Isolate Name                        | Isolate ID   | Date   | Region        | Country         | Host         | Subtype | Clade    |
|-------------------------------------|--------------|--------|---------------|-----------------|--------------|---------|----------|
| A/Anhui/1/2005                      | EPI_ISL_1005 | 2005   | Asia          | China           | Human        | A/H5    | 2.3.4    |
|                                     | 8            | -11-8  |               |                 |              | N1      |          |
| A/mallard duck/Netherlands/41/2015  | EPI_ISL_3289 | 2015   | Europe        | Netherlands     | Mallard      | A/H5    | EA_nonGs |
|                                     | 66           | -9-15  |               |                 |              | N1      | GD       |
| A/Hong Kong/156/97                  | EPI_ISL_954  | 1997   | Asia          | Hong Kong (SAR) | Human        | A/H5    | 0        |
|                                     |              | -XX-XX |               |                 |              | N1      |          |
| A/Anhui/2021-00011/2020             | EPI_ISL_1081 | 2020   | Asia          | China           | Human        | A/H5    | 2.3.4.4h |
|                                     | 370          | -12-22 |               |                 |              | N6      |          |
| A/Vietnam/1203/2004                 | EPI_ISL_1065 | 2006   | Asia          | Vietnam         | Human        | A/H5    | 1        |
|                                     | 6749         | -6-14  |               |                 |              | N1      |          |
| A/Indonesia/5/2005                  | EPI_ISL_1215 | 2005   | Asia          | Indonesia       | Human        | A/H5    | 2.1.3.2  |
|                                     | 41           | -XX-XX |               |                 |              | N1      |          |
| A/Sichuan/26221/2014                | EPI_ISL_1634 | 2014   | Asia          | China           | Human        | A/H5    | 2.3.4.4b |
|                                     | 93           | -4-21  |               |                 |              | N6      |          |
| A/gyrfalcon/Washington/41088-6/2014 | EPI_ISL_1738 | 2014   | North America | United States   | Gyrfalcon    | A/H5    | 2.3.4.4c |
|                                     | 78           | -12-8  |               |                 |              | N8      |          |
| A/whooper_swan/Mongolia/244/2005    | EPI_ISL_6495 | 2005   | Asia          | Mongolia        | Whooper swan | A/H5    | 2.2      |
|                                     | 6            | -XX-XX |               |                 |              | N1      |          |
| A/chicken/Mexico/07/2007            | EPI_ISL_2445 | 2007   | North America | Mexico          | Chicken      | A/H5    | Am_nonGs |
|                                     | 40           | -XX-XX |               |                 |              | N2      | GD       |

**Supplementary Table 2.** Geometric mean HI titers in pooled sera one day before challenge (27 days after immunization). Lower limit of detection = 5

| Mice        | H1N1<br>(A/Victoria) | H3N2<br>(A/Cambodia) | B/Washington<br>(Victoria lineage) | B/Phuket<br>(Yamagata lineage) |
|-------------|----------------------|----------------------|------------------------------------|--------------------------------|
| Vaccinated  | 196                  | 320                  | 28                                 | 40                             |
| Unimmunized | ≤ 5                  | ≤ 5                  | ≤ 5                                | ≤ 5                            |

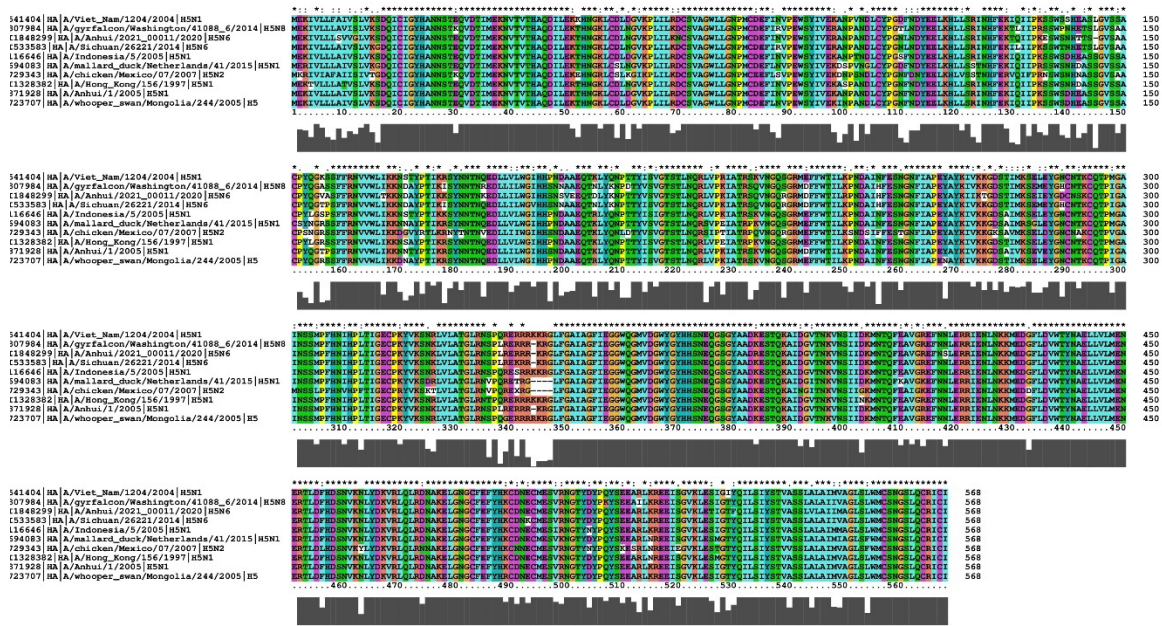

**Supplementary Fig. 1.** Alignment of the HA protein sequences for the A/H5 strains tested in the PNA.

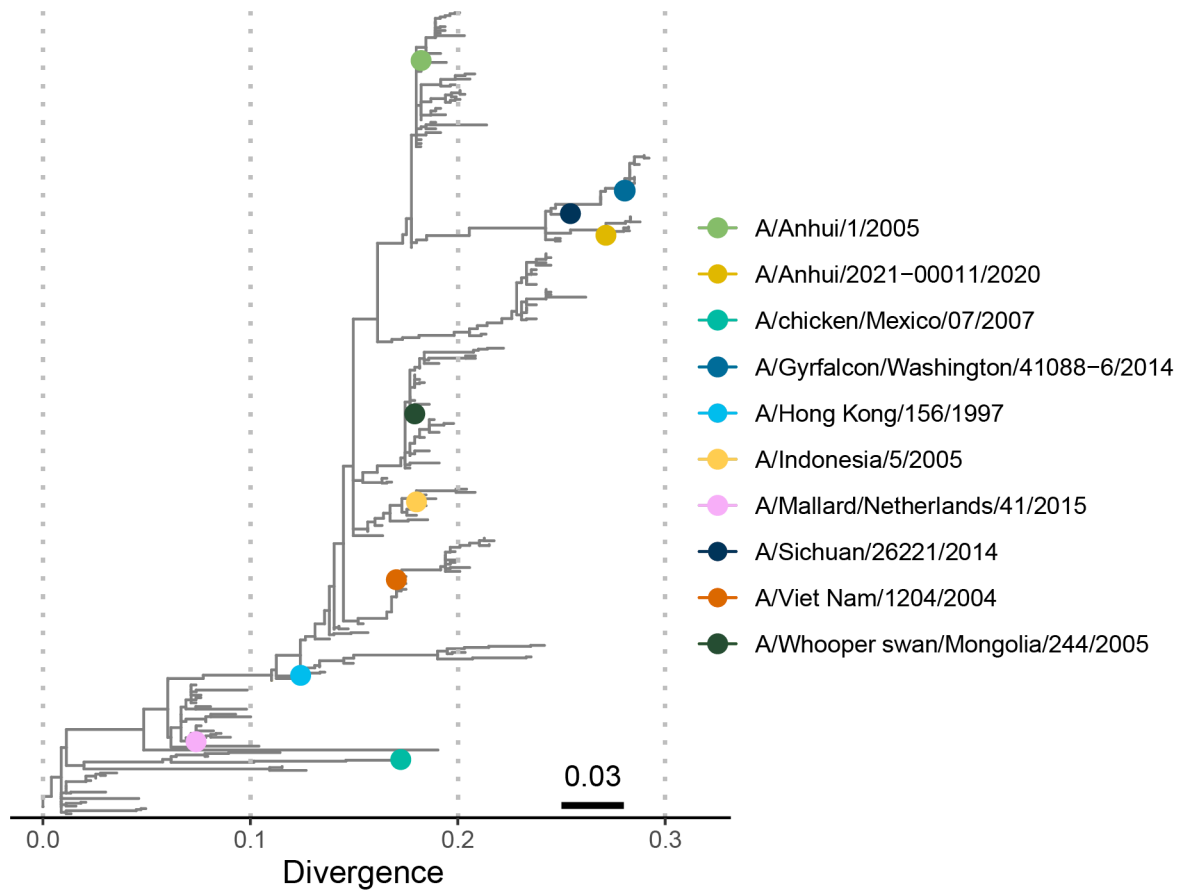

**Supplementary Fig. 2.** Complete phylogenetic tree based on the identity of the hemagglutinin protein sequence from 632 isolates. A/chicken/Scotland/1959 was used as a root for building the tree.
